# Supplementary material for: Impacts of Biogas Slurry Fertilization on Arbuscular Mycorrhizal Fungal Communities in the Rhizospheric Soil of Poplar Plantations
Source: MDPI journal article supplement (doi:10.3390/jof8121253), 2022-11-27
Supplement: s1 [file s1]

**Impacts of biogas slurry fertilization on arbuscular mycorrhizal fungal communities in rhizosphere soil of poplar plantations**

Running title: Effects of BS fertilization on AMF

Xing-Ye Yu<sup>1</sup>, Bao-Teng Wang<sup>1</sup>, Long Jin<sup>1</sup>, Hong-Hua Ruan<sup>1</sup>, Hyung-Gwan Lee<sup>2, \*</sup>, and Feng-Jie Jin<sup>1, \*</sup>

<sup>1</sup> College of Biology and the Environment, Co-Innovation Center for Sustainable Forestry in Southern China, Nanjing Forestry University, 159 Longpan Road, Nanjing 210037, China

<sup>2</sup> Cell Factory Research Centre, Korea Research Institute of Bioscience & Biotechnology (KRIBB), Daejeon 34141, Republic of Korea

\* Correspondence: jinfj@njfu.edu.cn (F.J.J.); trustin@kribb.re.kr (H.G.L.)

Tel.: +86-25-8542-7210 (F.J.J.); Tel.: +82-42-860-4318 (H.G.L.)

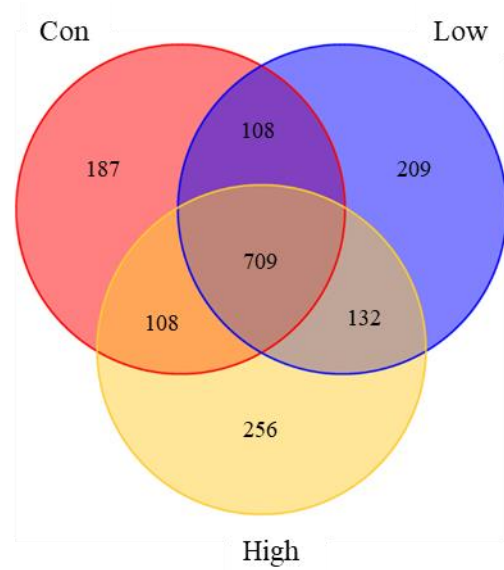

**Fig. S1** Venn diagram depicting the relationships between treatments. The overlapped and unique OTU numbers of AMF communities in rhizospheric soil between treatments are shown in the Venn diagram.

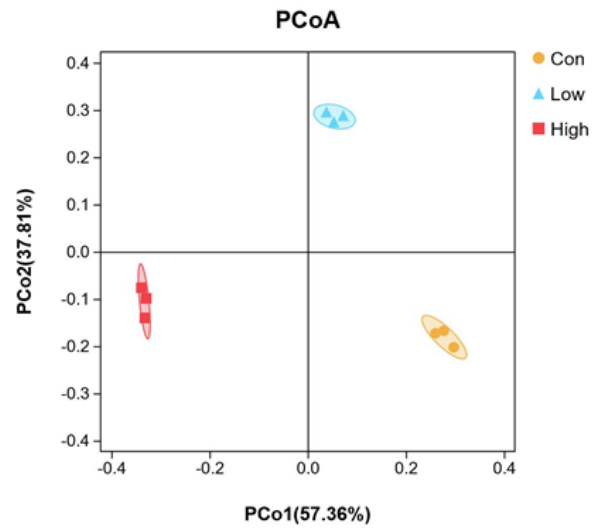

**Fig. S2** Principal coordinates analysis on AMF community structure in rhizosphere soil of poplar plantations treated with different concentrations of biogas slurry. Con - no treatment; Low - biogas slurry ( $250 \text{ m}^3 \text{ ha}^{-1} \text{ yr}^{-1}$ ) treatment; High - biogas slurry ( $375 \text{ m}^3 \text{ ha}^{-1} \text{ yr}^{-1}$ ) treatment.

**Table S1** Effects of biogas slurry treatments on the physical, chemical, and biological characteristics of rhizospheric soil (Yu et al., 2022<sup>a</sup>)

| Attribute                                                 | Con              | Low              | High             |
|-----------------------------------------------------------|------------------|------------------|------------------|
| pH                                                        | 7.90 ± 0.02 ab   | 7.80 ± 0.02 b    | 8.00 ± 0.02 a    |
| Moisture content                                          | 0.20 ± 0.00 a    | 0.20 ± 0.00 a    | 0.21 ± 0.01 a    |
| Total C (g kg <sup>-1</sup> )                             | 18.60 ± 0.37 a   | 19.35 ± 0.31 a   | 19.28 ± 0.88 a   |
| Total N (g kg <sup>-1</sup> )                             | 1.22 ± 0.03 a    | 1.32 ± 0.08 a    | 1.35 ± 0.08 a    |
| C / N                                                     | 15.22 ± 0.15 a   | 14.74 ± 0.69 ab  | 14.28 ± 0.22 b   |
| Nitrate (mg kg <sup>-1</sup> )                            | 33.11 ± 3.69 b   | 50.58 ± 30.77 a  | 33.82 ± 4.24 b   |
| Available P (mg kg <sup>-1</sup> )                        | 2.65 ± 0.06 b    | 4.45 ± 0.49 a    | 5.07 ± 0.66 a    |
| Microbial biomass C (mg kg <sup>-1</sup> )                | 240.45 ± 14.11 a | 203.46 ± 25.78 a | 153.16 ± 38.41 a |
| Microbial biomass N (mg kg <sup>-1</sup> )                | 15.52 ± 4.43 a   | 18.11 ± 1.90 a   | 19.12 ± 2.56 a   |
| Phosphatase (mg kg <sup>-1</sup> )                        | 1.49 ± 0.05 a    | 1.62 ± 0.06 a    | 1.50 ± 0.10 a    |
| Nitrate reductase (μmol d <sup>-1</sup> g <sup>-1</sup> ) | 7.03 ± 1.12 ab   | 7.58 ± 0.09 b    | 11.36 ± 0.96 a   |

Values are Mean ± standard error (n=3); Different lowercase letters within the same row denote significant ( $P < 0.05$ ) differences between treatments. Con - no treatment; Low - biogas slurry (250 m<sup>3</sup> ha<sup>-1</sup> yr<sup>-1</sup>) treatment; High - biogas slurry (375 m<sup>3</sup> ha<sup>-1</sup> yr<sup>-1</sup>) treatment.

<sup>a</sup> Yu, X.Y.; Zhu, Y.J.; Jin, L.; Wang, B.T.; Xu, X.; Zou, X.M.; Ruan, H.H.; Jin, F.J. Contrasting responses of fungal and bacterial communities to biogas slurry addition in rhizospheric soil of poplar plantations. *Appl Soil Ecol* 2022, 175, doi: 10.1016/j.apsoil.2022.104427.

**Table S2** Effect of biogas slurry fertilization on  $\alpha$ -diversity of AMF communities

| Group                | Shannon (P)   | Chao1 (P)     | No. of OTUs<br>(P) | Phylogenetic<br>diversity (P) |
|----------------------|---------------|---------------|--------------------|-------------------------------|
| Con vs. Low          | <b>0.0041</b> | 0.1070        | 0.0884             | 0.1242                        |
| Con vs. High         | <b>0.0442</b> | <b>0.0498</b> | 0.0886             | 0.2746                        |
| Low vs. High         | <b>0.0027</b> | 0.2326        | 0.6793             | 0.2508                        |
| Con vs. Low vs. High | <b>0.0040</b> | <b>0.0250</b> | 0.1680             | 0.2430                        |

Significant P values ( $P < 0.05$ ) are shown in bold. Con - no treatment; Low - biogas slurry ( $250 \text{ m}^3 \text{ ha}^{-1} \text{ yr}^{-1}$ ) treatment; High - biogas slurry ( $375 \text{ m}^3 \text{ ha}^{-1} \text{ yr}^{-1}$ ) treatment.

**Table S3** Genetic differentiation of AMF communities between groups by analysis of molecular variance (AMOVA)

| Group                | <i>df</i> | <i>MS</i> | <i>F</i> | <i>P</i>     |
|----------------------|-----------|-----------|----------|--------------|
| Con vs. Low          | 1         | 0.508473  | 24.2658  | 0.09         |
| Low vs. High         | 1         | 0.434046  | 23.9339  | 0.094        |
| Con vs. High         | 1         | 0.426067  | 23.1497  | <b>0.019</b> |
| Con vs. Low vs. High | 2         | 0.456195  | 23.8038  | <b>0.001</b> |

Significant *P* values ( $P < 0.05$ ) are shown in bold. Con - no treatment; Low - biogas slurry (250 m<sup>3</sup> ha<sup>-1</sup> yr<sup>-1</sup>) treatment; High - biogas slurry (375 m<sup>3</sup> ha<sup>-1</sup> yr<sup>-1</sup>) treatment.

**Table S4** Relative abundance of AMF community composition at the order level.

| Order           | Con                    | Low                   | High                  |
|-----------------|------------------------|-----------------------|-----------------------|
| Glomerales      | 0.400434 ± 0.012410 ab | 0.362270 ± 0.013430 b | 0.426858 ± 0.007948 a |
| Paraglomerales  | 0.062060 ± 0.001531 c  | 0.129547 ± 0.003331 a | 0.106767 ± 0.001219 b |
| Diversisporales | 0.040220 ± 0.001292 a  | 0.022593 ± 0.000878 b | 0.038234 ± 0.001118 a |
| Archaeosporales | 0.021925 ± 0.001935 a  | 0.005373 ± 0.000792 b | 0.006036 ± 0.000717 b |
| Others          | 0.475361 ± 0.016947 a  | 0.480217 ± 0.016664 a | 0.422104 ± 0.008927 a |

Values are Mean ± standard error (n=3); Different lowercase letters within the same row denote significant ( $P <$

0.05) differences between treatments. Con - no treatment; Low - biogas slurry ( $250 \text{ m}^3 \text{ ha}^{-1} \text{ yr}^{-1}$ ) treatment; High -

biogas slurry ( $375 \text{ m}^3 \text{ ha}^{-1} \text{ yr}^{-1}$ ) treatment.

**Table S5** Relative abundance of AMF community composition at the genus level.

| Genus           | Con                   | Low                    | High                   |
|-----------------|-----------------------|------------------------|------------------------|
| Glomus          | 0.216391 ± 0.009579 b | 0.241247 ± 0.007182 b  | 0.291485 ± 0.004839 a  |
| Paraglomus      | 0.062060 ± 0.001531 c | 0.1295476 ± 0.003331 a | 0.106767 ± 0.001219 b  |
| Claroideoglomus | 0.100813 ± 0.003907 a | 0.052352 ± 0.002110 b  | 0.086393 ± 0.002479 a  |
| Diversispora    | 0.011904 ± 0.000561 a | 0.009322 ± 0.000499 b  | 0.011917 ± 0.001088 ab |
| Scutellospora   | 0.006199 ± 0.000487 b | 0.000149 ± 0.000011 c  | 0.016154 ± 0.000864 a  |
| Archaeospora    | 0.007443 ± 0.000426 a | 0.002596 ± 0.000643 b  | 0.000551 ± 0.000148 b  |
| Ambispora       | 0.000591 ± 0.000421 b | 0.000685 ± 0.000276 b  | 0.002418 ± 0.000280 a  |
| Pacispora       | 0.000048 ± 0.000035 b | 0.000003 ± 0.000003 b  | 0.000251 ± 0.000034 a  |
| Redeckera       | 0.000206 ± 0.000047 a | 0.000024 ± 0.000010 b  | 0.000022 ± 0.000009 b  |

Values are Mean ± standard error (n=3); Different lowercase letters within the same row denote significant ( $P < 0.05$ ) differences between treatments. Con - no treatment; Low - biogas slurry ( $250 \text{ m}^3 \text{ ha}^{-1} \text{ yr}^{-1}$ ) treatment; High - biogas slurry ( $375 \text{ m}^3 \text{ ha}^{-1} \text{ yr}^{-1}$ ) treatment.
